# Supplementary material
Source: PubMed Central journal article supplement (PMC11387870)
Supplement: ajcr0014-3896-f4.pdf [file ajcr0014-3896-f4.pdf]

## Personalized mRNA vaccine of esophageal carcinoma

**Supplementary Table 1.** bTMB and list of ctDNA gene mutations

| Specimen        | No. | Gene    | Chromosome | Exon     | Base change | Variability (%) | Mutation type | bTMB (Muts/Mb) |
|-----------------|-----|---------|------------|----------|-------------|-----------------|---------------|----------------|
| Baseline        | 1   | HSD17B3 | chr9       | Exon7    | c.521C>A    | 10.19           | Point         | 7.63           |
|                 | 2   | CFD     | chr19      | Exon5    | c.728G>A    | 5.56            | Point         |                |
|                 | 3   | KMT2D   | chr12      | Exon31   | c.7417C>T   | 4.79            | Point         |                |
|                 | 4   | ACVR1   | chr2       | Exon5    | c.421C>G    | 4.14            | Point         |                |
|                 | 5   | EP300   | chr22      | Exon2    | c.361A>G    | 2               | Point         |                |
|                 | 6   | DDX51   | chr12      | Exon10   | c.1510T>G   | 1.58            | Point         |                |
|                 | 7   | TMEM127 | chr2       | Exon2    | c.119C>G    | 0.93            | Point         |                |
|                 | 8   | CDK8    | chr13      | Exon7    | c.656C>T    | 0.65            | Point         |                |
|                 | 9   | LRP1B   | chr2       | Exon64   | c.9964-1G>C | 0.48            | Point         |                |
|                 | 10  | FGFR1   | chr8       | Exon11   | c.1448G>T   | 0.46            | Point         |                |
|                 | 11  | GATA1   | chrX       | Exon6    | c.958A>T    | 0.46            | Point         |                |
|                 | 12  | TP53    | chr17      | Exon5    | c.524G>A    | 0.44            | Point         |                |
|                 | 13  | PPP2R2A | chr8       | Exon8    | c.899dup    | 7.81            | Insertional   |                |
|                 | 14  | TP53    | chr17      | Exon5    | c.486del    | 7.56            | Insertional   |                |
| After Treatment | 1   | TP53    | chr17      | Exon5    | c.524G>A    | 0.54            | Point         | 1.53           |
|                 | 2   | TERT    | chr5       | Upstream | c.-362C>T   | 0.25            | Point         |                |
